# Supplementary material for: WeChatting for Health: What Motivates Older Adult Engagement with Health Information
Source: MDPI journal article supplement (doi:10.3390/healthcare9060751), 2021-06-18
Supplement: s1 [file s1]

**Table S1. Older adult's motivations for health purpose on WeChat.**

| <b>Motivations</b>                                                                                                                                | <b>Frequency</b> | <b>Motivations</b>                                                                                                                                     | <b>Frequency</b> |
|---------------------------------------------------------------------------------------------------------------------------------------------------|------------------|--------------------------------------------------------------------------------------------------------------------------------------------------------|------------------|
| I have acquired all kinds of medical knowledge and healthcare information through WeChat, which is difficult for me to obtain from other channels | 20               | To express personal stance on health issues makes me feel satisfied                                                                                    | 10               |
| I can obtain emotional and informational support from others on WeChat when discussing some health issues and personal health conditions          | 17               | It is convenient and time-saving to use WeChat to book online medical registration                                                                     | 9                |
| WeChat helps me to access tailored and customized healthcare advice from online disease diagnosis and treatment                                   | 15               | WeChat offers online medical diagnosis and telehealth, which helps me quickly find famous doctors I would normally struggle to get an appointment with | 9                |
| I can get more health education on WeChat                                                                                                         | 15               | To filter health-related misinformation and offer high quality information for WeChat friends and groups                                               | 8                |
| WeChat helps me to access tailored and customized healthcare advice from online disease diagnosis and treatment                                   | 14               | WeChat allows me to monitor and filter health-related rumors and fake news                                                                             | 7                |
| I often share my experiences and knowledge on medication, daily care, diet and exercise with people with similar health conditions on WeChat      | 14               | My community uses WeChat to issue health notifications such as vaccinations and free clinic information                                                | 7                |
| To show my care to my family and friends by sharing meaningful health information on WeChat                                                       | 13               | It is very efficient and convenient for the community to deliver health notifications through WeChat                                                   | 7                |
| To build and consolidate relationships by sharing important health information                                                                    | 13               | I feel empowered to sharing health information and to give health-related advice to WeChat friends and groups                                          | 6                |
| Through the WeChat official account and Moments, I can keep abreast of the latest developments in public health events                            | 12               | I often ask my friends to exercise together through WeChat, which improved my enthusiasm                                                               | 6                |
| WeChat provides timely and authoritative coverage of public health issues and health policy                                                       | 11               | To provide professional drug information                                                                                                               | 3                |
| I can search for any health information I need from WeChat                                                                                        | 11               | WeChat sports and health code help me manage my health                                                                                                 | 3                |

**Table S2. Demographic information of participants (n = 690).**

| <b>Measure</b> | <b>Range</b>                                                   | <b>M (SD)</b> | <b>Percentage (%)</b> |
|----------------|----------------------------------------------------------------|---------------|-----------------------|
| Gender         | Female (vs. male)                                              |               | 47.5                  |
| Age in years   | 50–74                                                          | 60.47 (6.21)  |                       |
| Education      | 1–5 (from primary school or below to Master’s degree or above) | 2.85 (0.89)   |                       |
| Monthly income | 1–5 (from CNY 1000 or below to CNY 7000 or above)              | 2.91 (1.07)   |                       |
| Health status  | 1–5 (very bad to very good)                                    | 2.53 (0.935)  |                       |

Table S3. Factor analysis of motivations for health-purpose on WeChat.

| Motivation Items                                                                                                                                                | Factors |       |       |       |       |       | M    | SD   |
|-----------------------------------------------------------------------------------------------------------------------------------------------------------------|---------|-------|-------|-------|-------|-------|------|------|
|                                                                                                                                                                 | 1       | 2     | 3     | 4     | 5     | 6     |      |      |
| Social Support                                                                                                                                                  |         |       |       |       |       |       |      |      |
| I can obtain emotional and informational support from others on WeChat when discussing health issues and personal health conditions                             | 0.765   | 0.125 | 0.039 | 0.166 | 0.141 | 0.088 |      |      |
| I often ask my friends to exercise together through WeChat, which improved my enthusiasm                                                                        | 0.732   | 0.221 | 0.104 | 0.14  | 0.136 | 0.135 |      |      |
| I often share my experiences and knowledge on medication, daily care, diet, and exercise with people with similar health conditions on WeChat                   | 0.731   | 0.114 | 0.036 | 0.183 | 0.248 | 0.075 | 3.8  | 0.80 |
| I am a member of some health and wellness groups. When we talked about health-related topics, I felt the emotional support and comfort from other group members | 0.729   | 0.216 | 0.127 | 0.138 | 0.046 | 0.007 |      |      |
| My community uses WeChat to issue health notifications such as vaccinations and free clinic information                                                         | 0.699   | 0.185 | 0.115 | 0.138 | 0.099 | 0.089 |      |      |
| Information Need                                                                                                                                                |         |       |       |       |       |       |      |      |
| I can get more health education on WeChat                                                                                                                       | 0.219   | 0.788 | 0.145 | 0.103 | 0.158 | 0.035 |      |      |
| WeChat helps me to access tailored and customized healthcare advice from online diseases diagnosis and treatment                                                | 0.152   | 0.752 | 0.092 | 0.106 | 0.138 | 0.113 |      |      |
| I have acquired all kinds of medical knowledge and healthcare information through WeChat, which is difficult for me to obtain from other channels               | 0.197   | 0.747 | 0.051 | 0.172 | 0.181 | 0.095 | 3.66 | 0.83 |
| I can search for any health information I need from WeChat                                                                                                      | 0.221   | 0.727 | 0.103 | 0.128 | 0.158 | 0.12  |      |      |
| Technological Convenience                                                                                                                                       |         |       |       |       |       |       |      |      |
| WeChat offers online medical diagnosis and telehealth, which helps me quickly find famous doctors I would normally struggle to get an appointment with          | 0.12    | 0.062 | 0.897 | 0.05  | 0.162 | 0.108 |      |      |
|                                                                                                                                                                 |         |       |       |       |       |       | 3.88 | 0.88 |
| It is convenient and time-saving to use WeChat to book online medical registration                                                                              | 0.102   | 0.123 | 0.839 | 0.063 | 0.187 | 0.154 |      |      |
| It is very efficient and convenient for the                                                                                                                     | 0.101   | 0.155 | 0.833 | 0.054 | 0.17  | 0.114 |      |      |

|                                                                                                                    |        |        |        |              |              |              |      |      |
|--------------------------------------------------------------------------------------------------------------------|--------|--------|--------|--------------|--------------|--------------|------|------|
| community to deliver health notifications through WeChat                                                           |        |        |        |              |              |              |      |      |
| <b>Social Interaction</b>                                                                                          |        |        |        |              |              |              |      |      |
| Through WeChat official account and Moments, I can keep abreast of the latest developments in public health events | 0.314  | 0.15   | 0.052  | <b>0.816</b> | 0.139        | 0.16         |      |      |
| WeChat allows me to monitor and filter health-related rumors and fake news                                         | 0.224  | 0.15   | 0.049  | <b>0.812</b> | 0.053        | 0.065        | 3.70 | 0.90 |
| WeChat provides timely and authoritative coverage of public health issues and health policy                        | 0.136  | 0.151  | 0.068  | <b>0.81</b>  | 0.124        | 0.073        |      |      |
| <b>Surveillance Need</b>                                                                                           |        |        |        |              |              |              |      |      |
| To show my care to my family and friends by sharing meaningful health information on WeChat                        | 0.179  | 0.191  | 0.188  | 0.093        | <b>0.79</b>  | 0.122        |      |      |
| To filter health-related misinformation and offer high quality information for WeChat friends and groups           | 0.192  | 0.181  | 0.193  | 0.168        | <b>0.748</b> | 0.117        | 3.79 | 0.86 |
| To build and consolidate relationships by sharing important health information                                     | 0.209  | 0.278  | 0.225  | 0.078        | <b>0.72</b>  | 0.1          |      |      |
| <b>Self-Agency Building</b>                                                                                        |        |        |        |              |              |              |      |      |
| I feel empowered to share health information and to give health-related advice to WeChat friends and groups        | 0.127  | 0.134  | 0.191  | 0.133        | 0.148        | <b>0.891</b> |      |      |
|                                                                                                                    |        |        |        |              |              |              | 3.64 | 0.95 |
| To express personal stance on health issues makes me feel satisfied                                                | 0.154  | 0.164  | 0.175  | 0.128        | 0.137        | <b>0.889</b> |      |      |
| Eigenvalue                                                                                                         | 3.19   | 2.733  | 2.487  | 2.254        | 2.084        | 1.783        |      |      |
| Variance explained (%)                                                                                             | 15.951 | 13.667 | 12.437 | 11.269       | 10.422       | 8.914        |      |      |
| Cronbach's alpha                                                                                                   | 0.846  | 0.739  | 0.706  | 0.84         | 0.806        | 0.898        |      |      |
